# Supplementary material
Source: MDPI journal article supplement (https://www.mdpi.com/2571-9408/7/4/92)
Supplement: s1 [file s1 › heritage-2864887-supplementary.pdf]

## Article

# Identification of Degradation Products and Components in Shellfish Purple by Ultrahigh Performance Liquid Chromatography Coupled with Tandem Mass Spectrometry

Athina Vasileiadou <sup>1</sup>, Ioannis Sampsonidis <sup>2,\*</sup>, Georgios Theodoridis <sup>1</sup>, Anastasia Zotou <sup>1</sup>, Ioannis Karapanagiotis <sup>1</sup> and Stavros Kalogiannis <sup>2,\*</sup>

<sup>1</sup> Department of Chemistry, Aristotle University of Thessaloniki, 54124 Thessaloniki, Greece; ecclesiasticalrelics@gmail.com (A.V.); gtheodor@chem.auth.gr (G.T.); azotou@chem.auth.gr (A.Z.); karapana@chem.auth.gr (I.K.)

<sup>2</sup> Department of Nutritional Sciences and Dietetics, International Hellenic University, 57400 Thessaloniki, Greece

\* Correspondence: isampson@nutr.teithe.gr (I.S.); kalogian@ihu.gr (S.K.); Tel.: +30-2310-013900 (I.S.); +30-2310-013924 (S.K.)

## Isatin

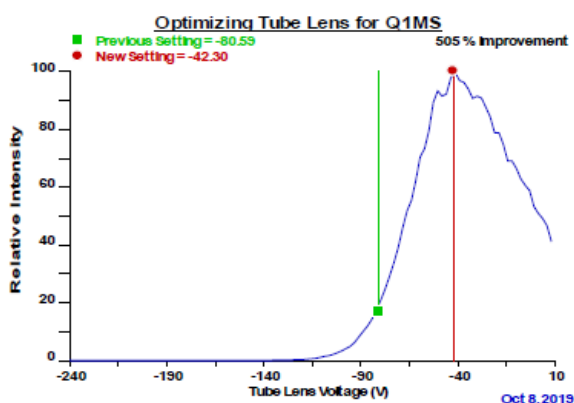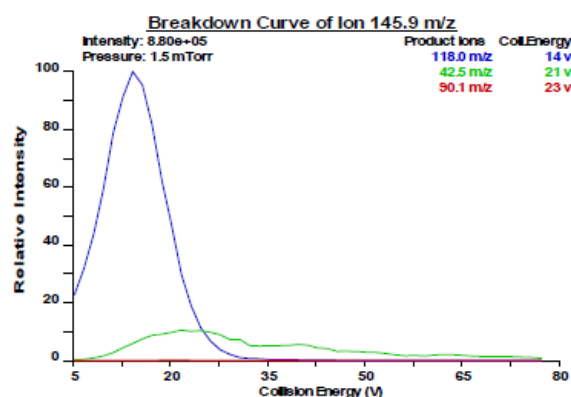

## Indigotin

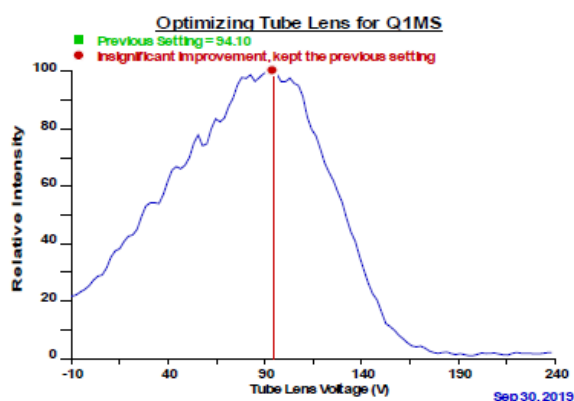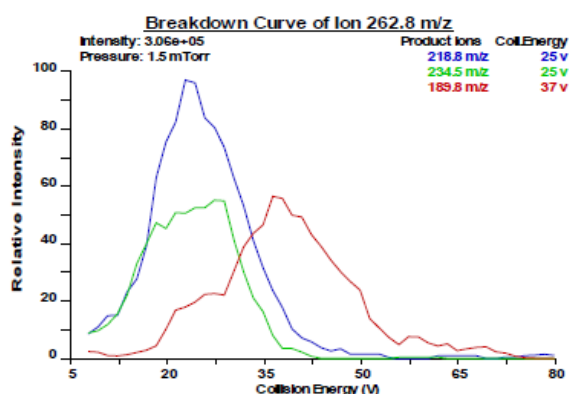

## Indiroubin

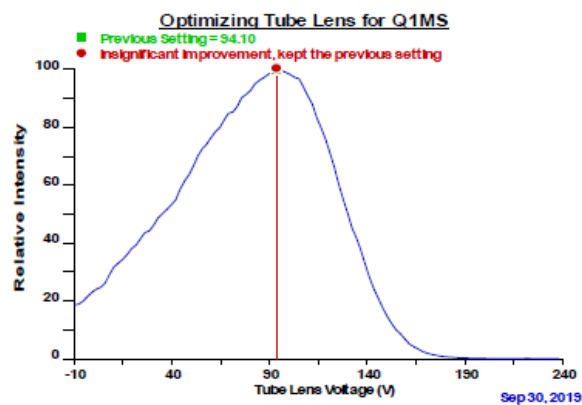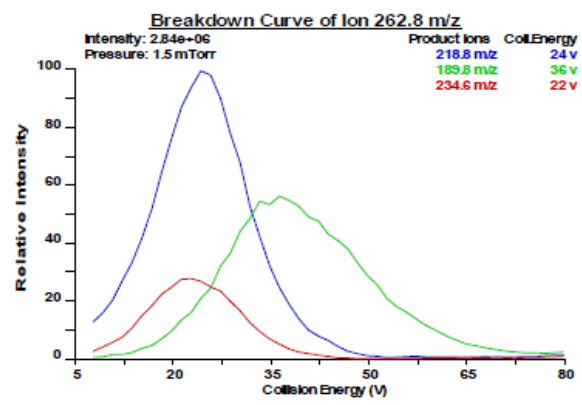

6-bromoindigotin

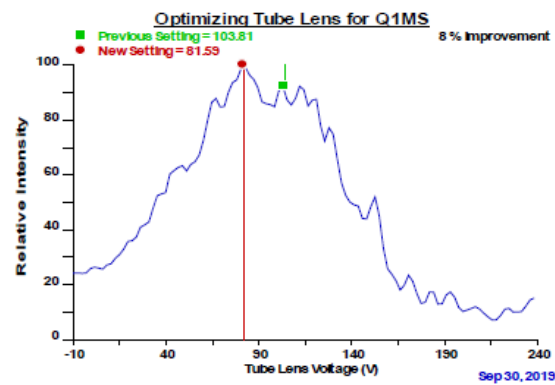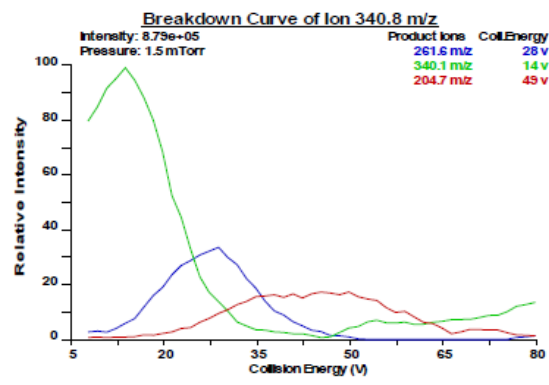

6'-bromoindiroubin

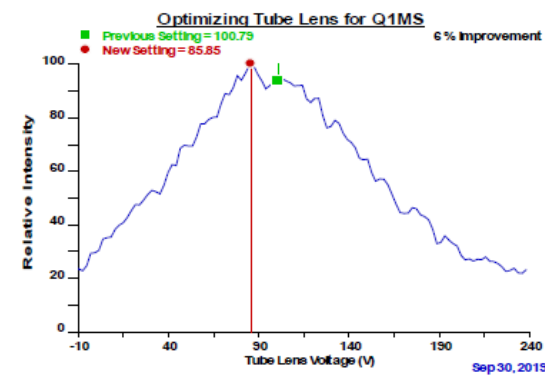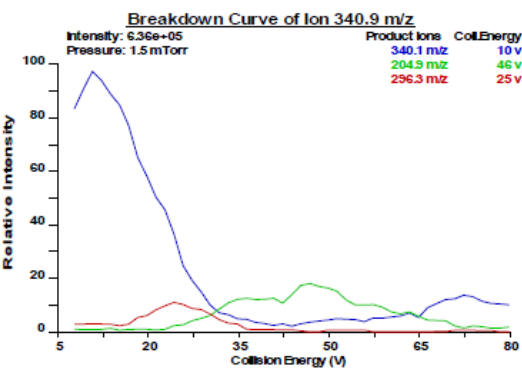

6-bromoindiroubin

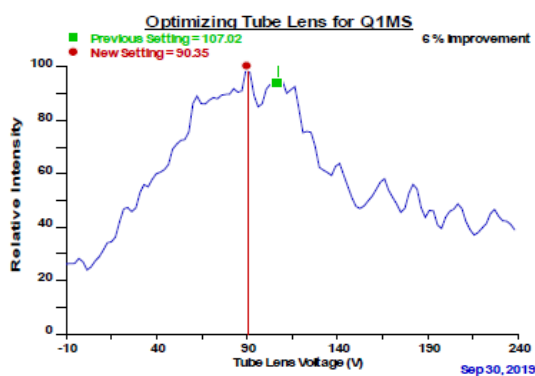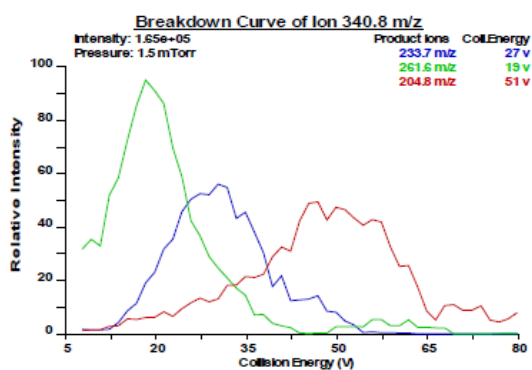

### 6,6'-dibromoindigotin

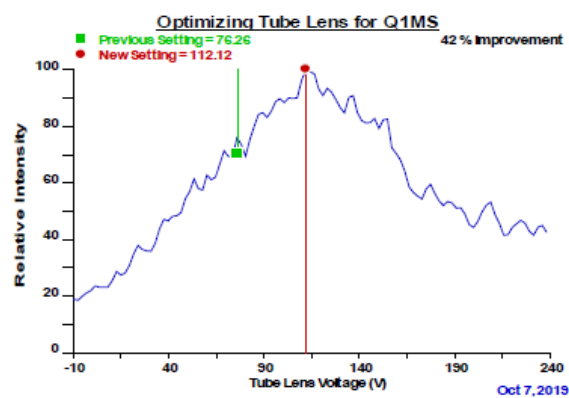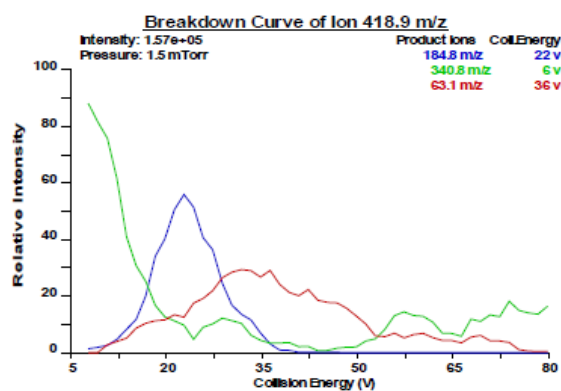

### 6,6'-dibromoindiroubin

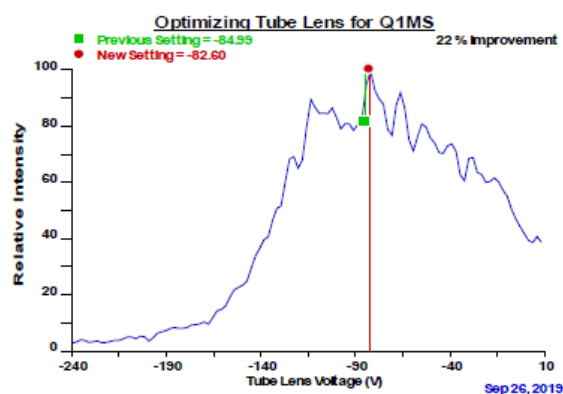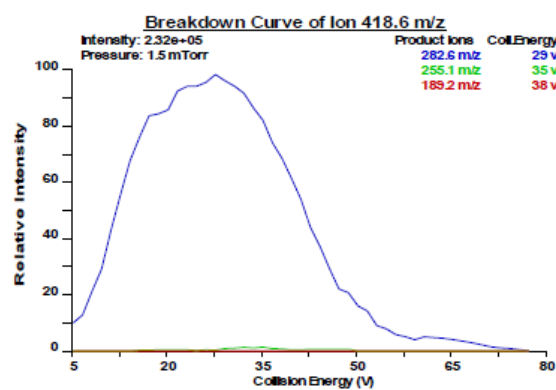

**Figure S1.** The optimizing tube lens and breakdown curve of ion of isatin, indigotin, indiroubin and their brominated derivatives.

## Isatin

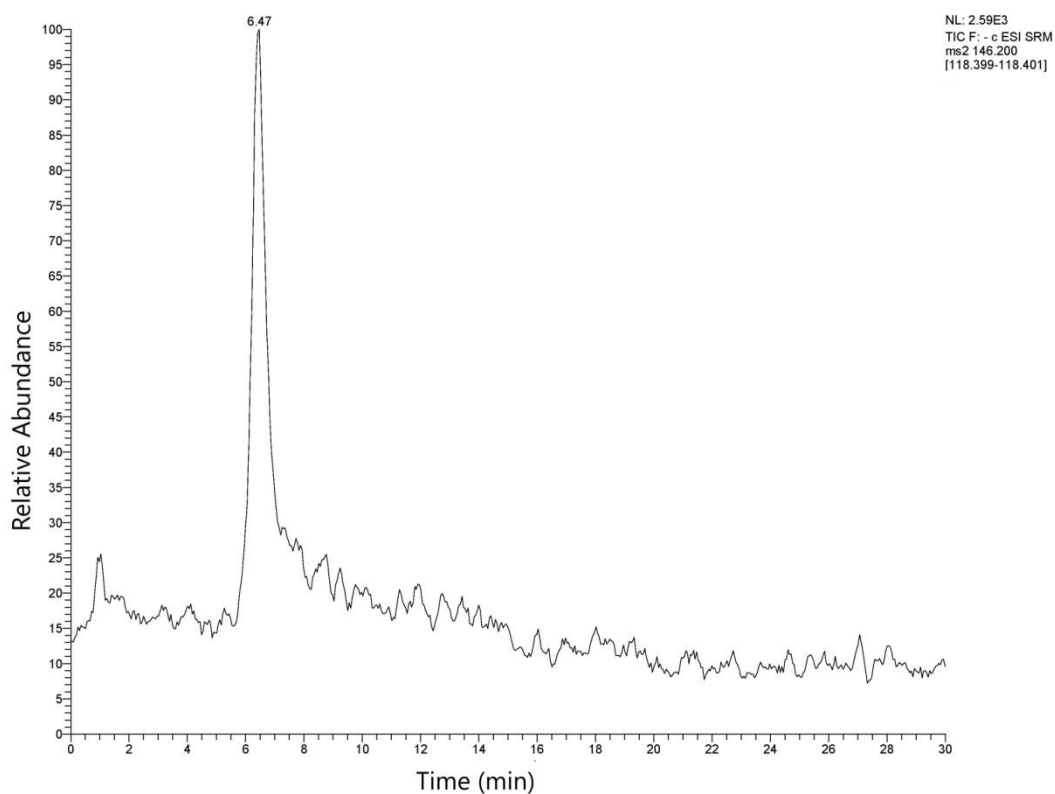

## Indigotin

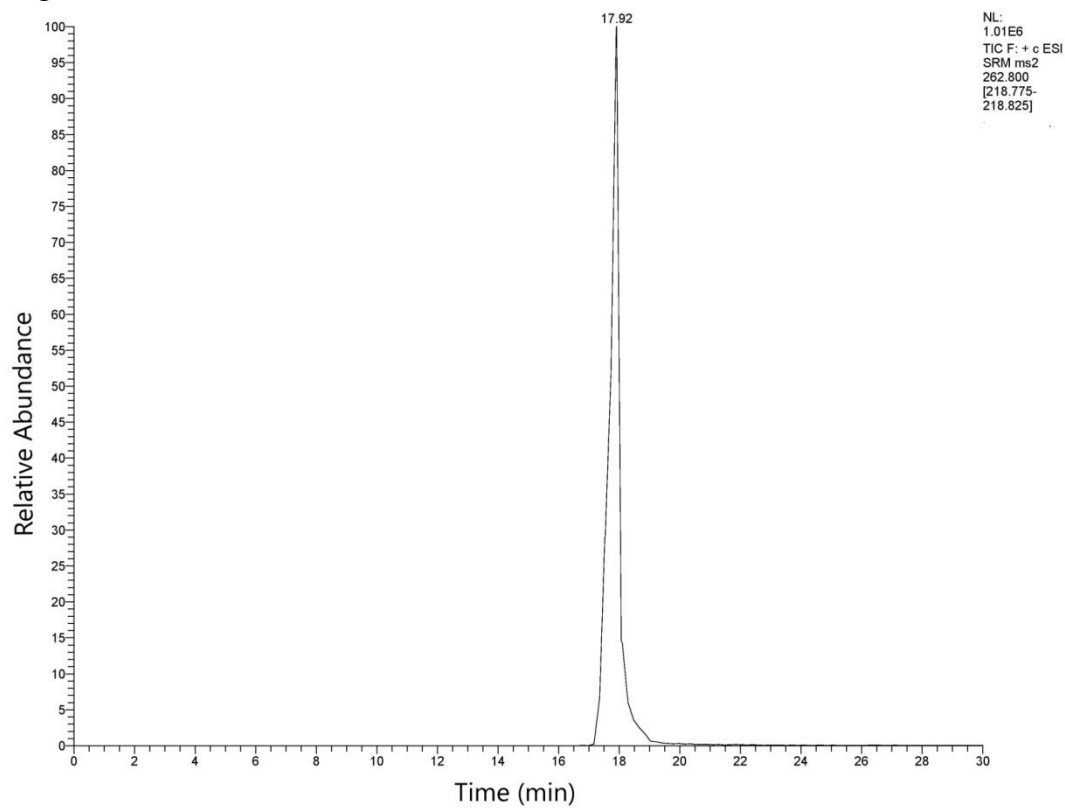

## Indiroubin

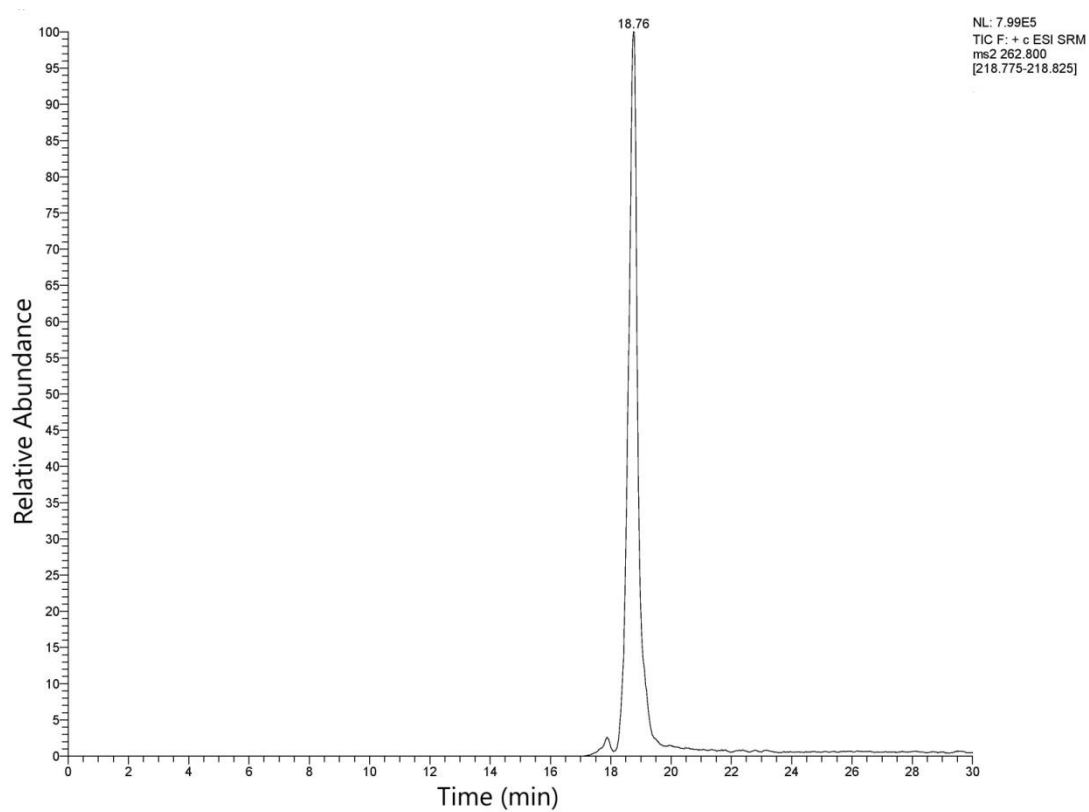

### 6-bromoindirubin

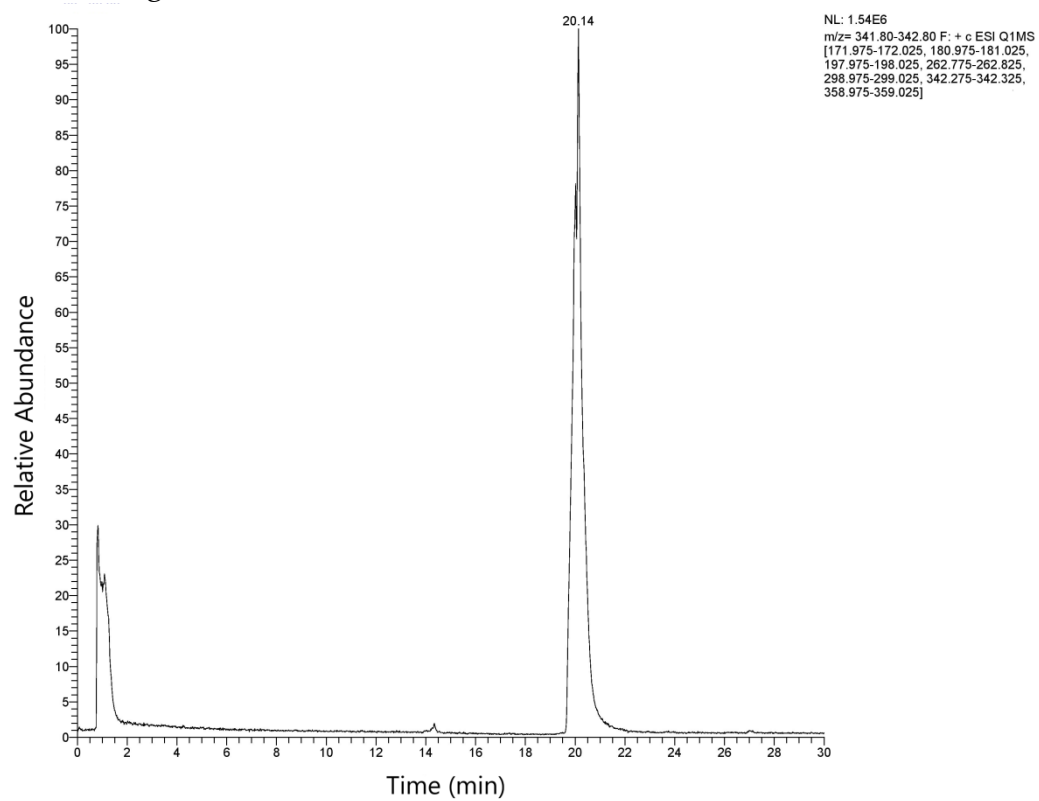

### 6'-bromoindirubin

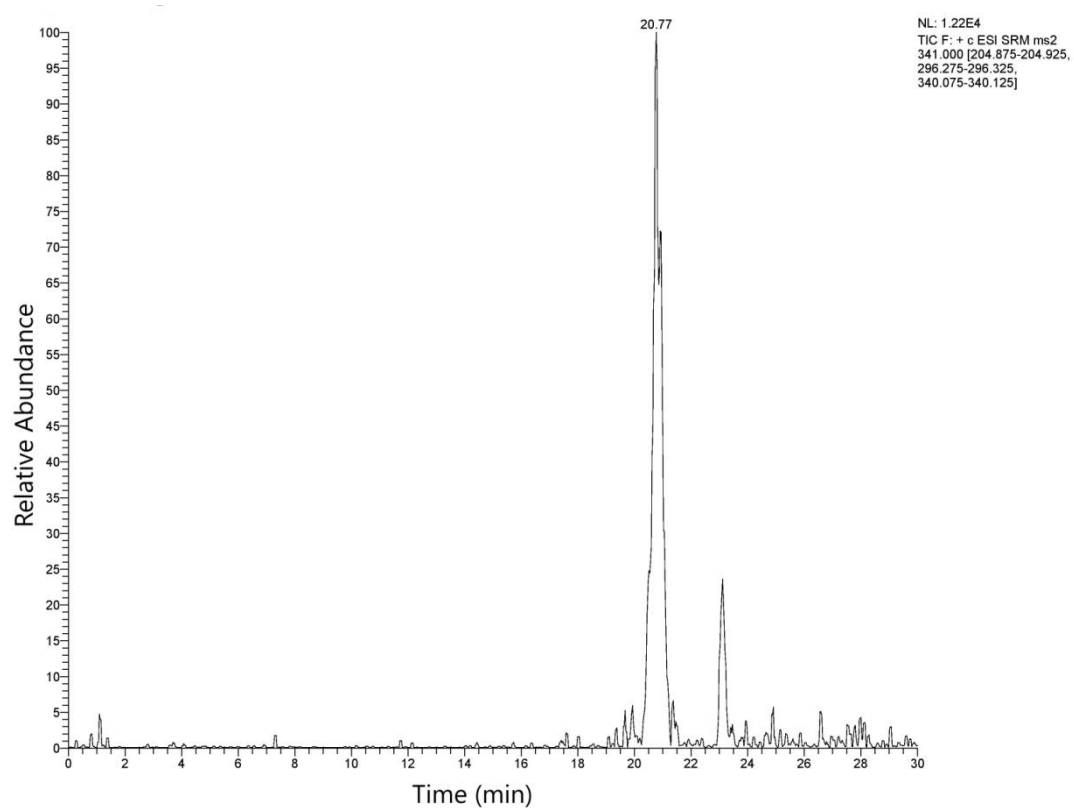

### 6-bromoindirubin

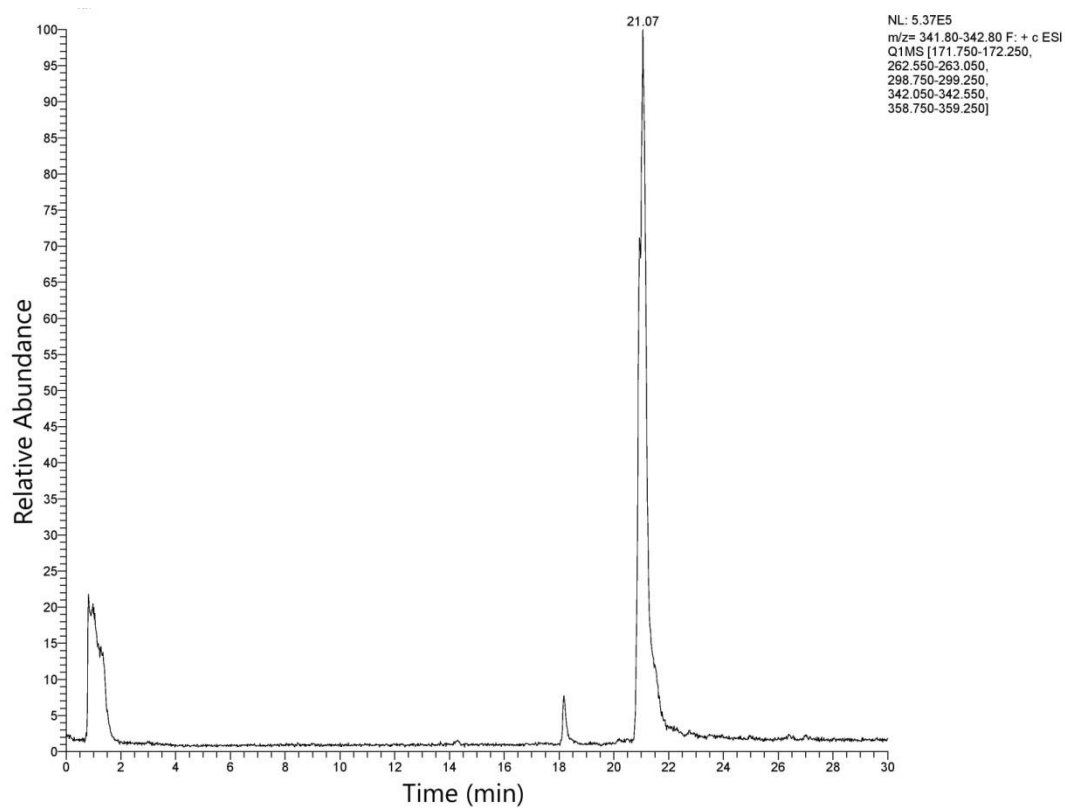

### 6,6'-dibromoindigotin

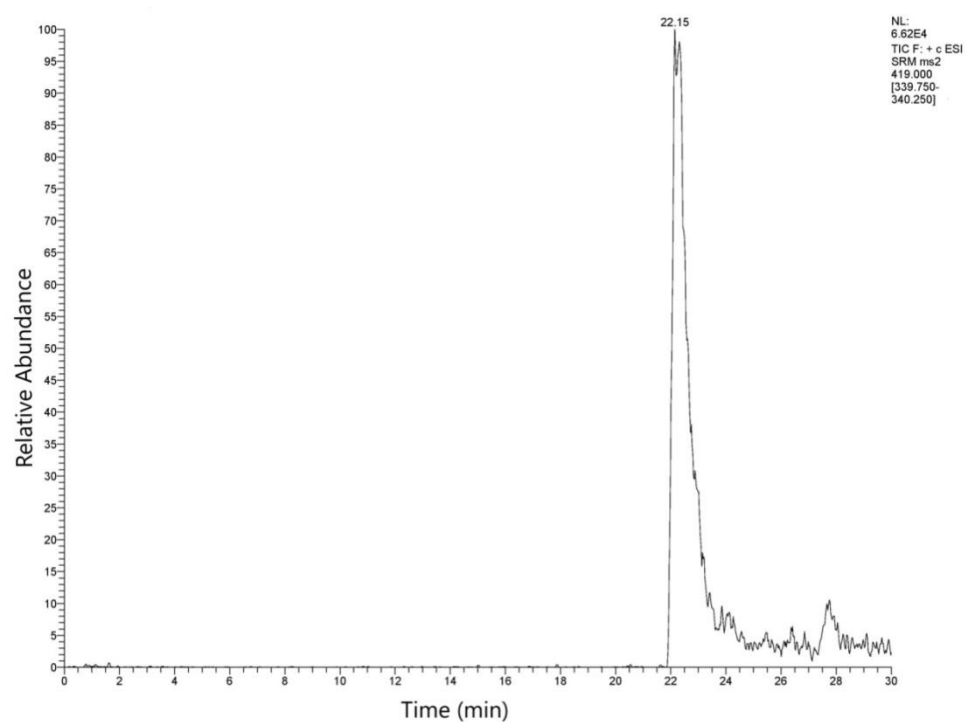

### 6,6'-dibromoindirubin

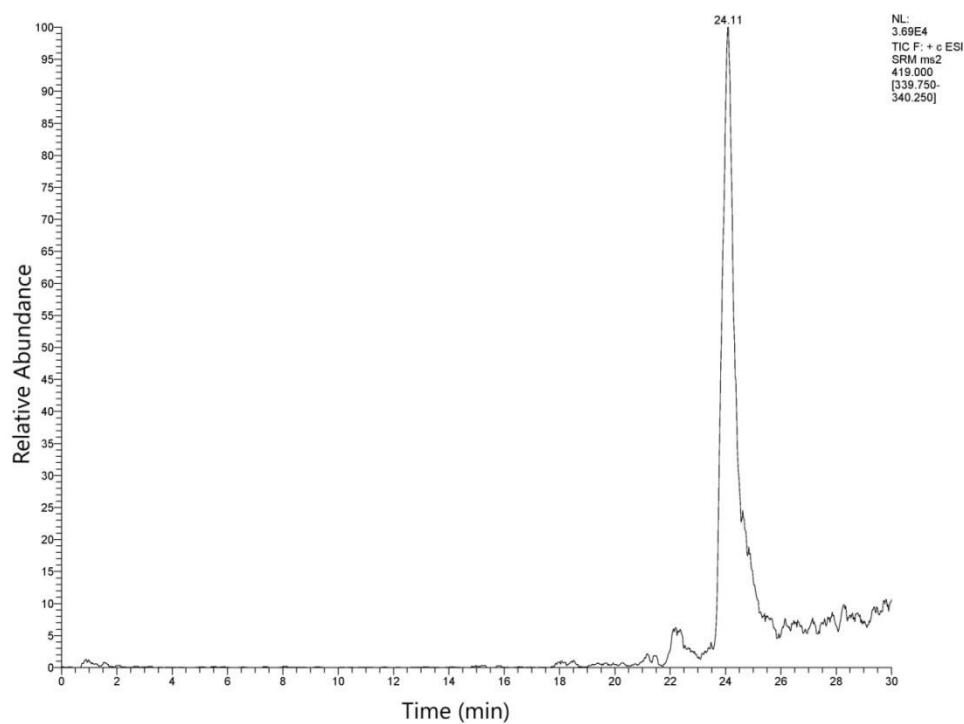

**Figure S2.** The chromatograms for the components at concentration of 10  $\mu\text{g mL}^{-1}$ .

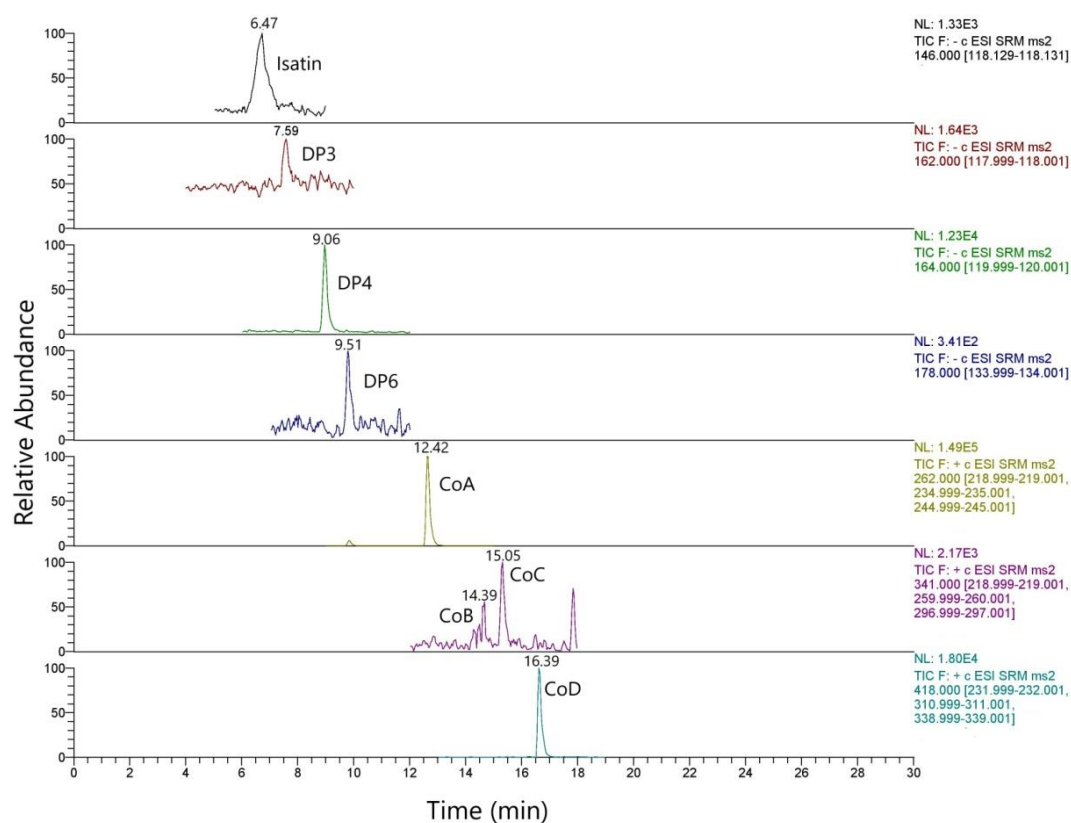

**Figure S3.** The degradation products and four coloring components of the solution of shellfish purple that left at room temperature for 30 days.

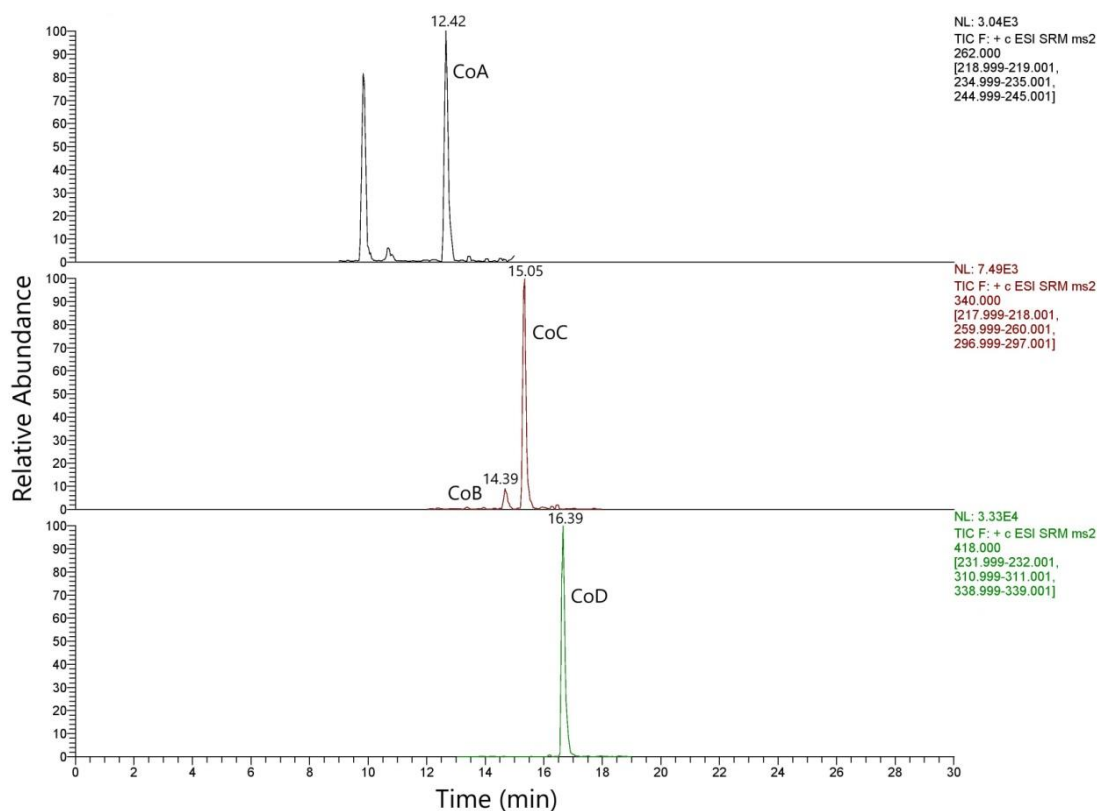

(a)

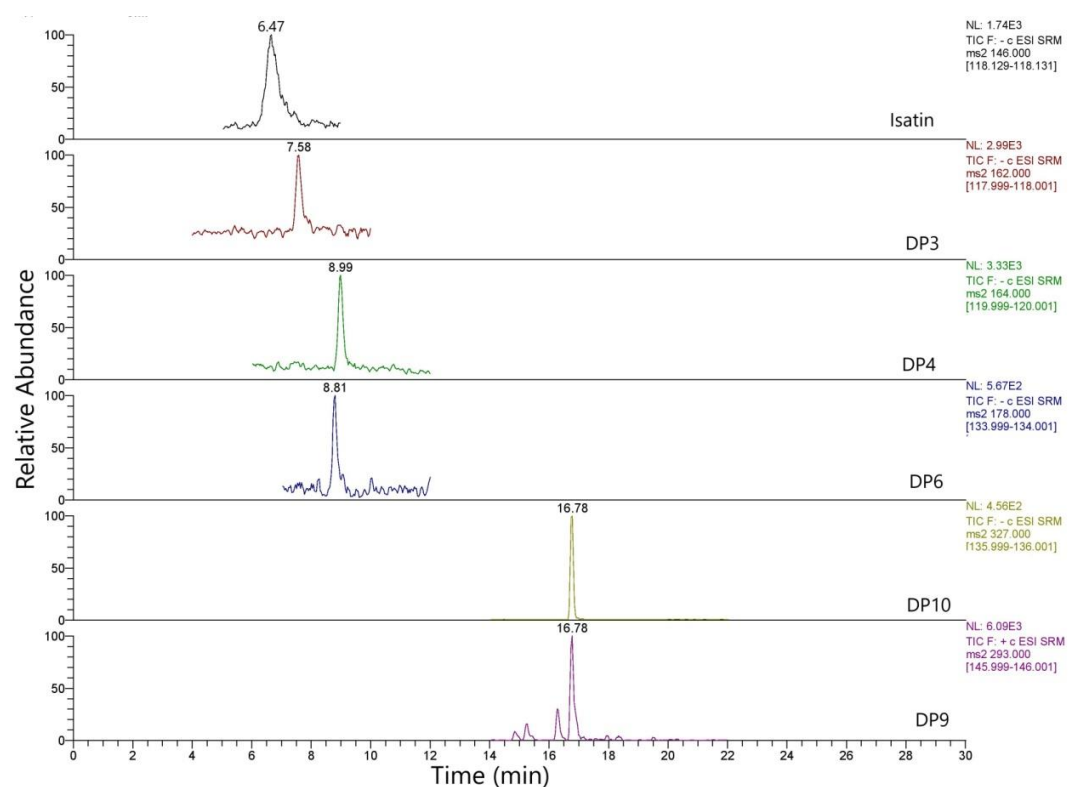

(b)

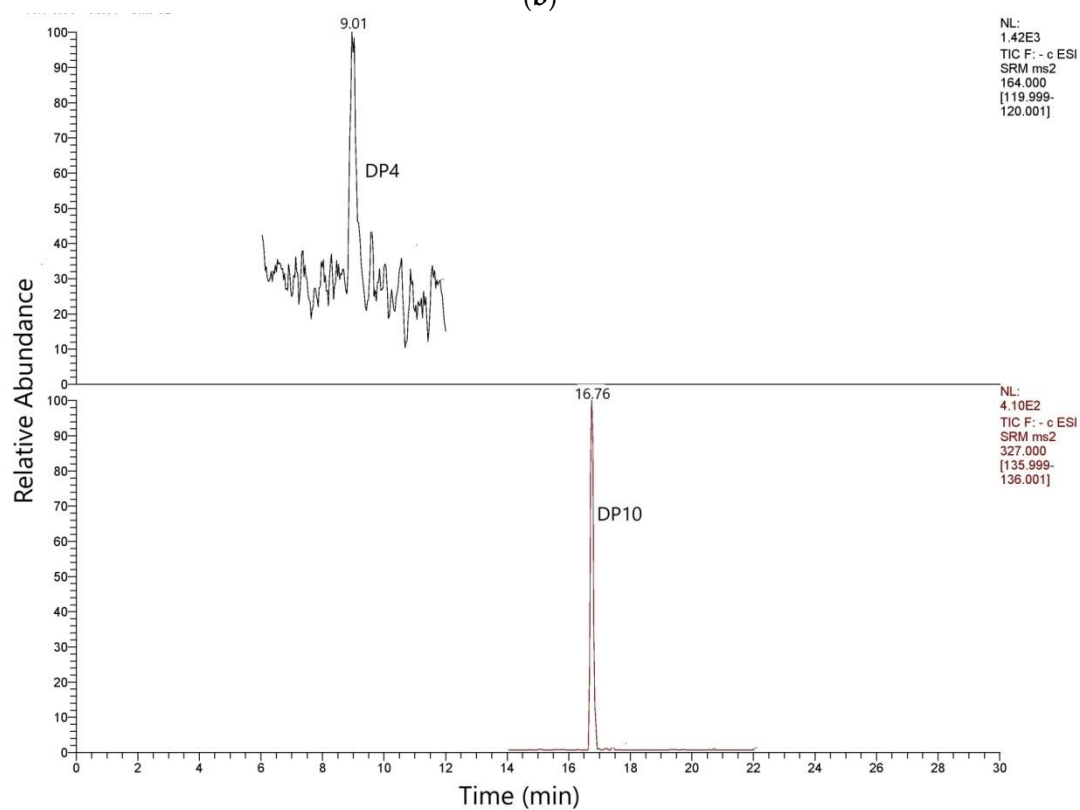

(c)

**Figure S4.** Chromatograms of silk sample dyed with shellfish purple; a) four coloring components, b) degradation products in fresh solution and c) degradation products in the solution after 30 days.
